# Supplementary material for: Associations between future health expectations and patient satisfaction after lumbar spine surgery: a longitudinal observational study of 9929 lumbar spine surgery procedures
Source: PubMed Central journal article supplement (PMC10533696; doi:10.1136/bmjopen-2023-074072), 2023-09-25
Supplement: bmjopen-2023-074072supp001.pdf [file bmjopen-2023-074072supp001.pdf]

**Table S1** Comparison of baseline characteristics between included and excluded patients.

|                | LSS         |             | LDH         |             |
|----------------|-------------|-------------|-------------|-------------|
|                | Included    | Excluded    | Included    | Excluded    |
| n              | 3969        | 5639        | 5960        | 8559        |
| Age, mean (SD) | 66 (10.1)   | 67.8 (10.8) | 44.8 (12.6) | 44.4 (13.1) |
| BMI, mean (SD) | 27.6 (4.01) | 27.7 (4.18) | 26.3 (4.12) | 26.6 (4.28) |
| Women, n (%)   | 1819 (45.8) | 2855 (50.6) | 2635 (44.2) | 3760 (43.9) |

**Table S2** Distribution of the SF-36 item 11c (I expect my health to get worse) responses preoperatively and year 1 for LSS (n=3969) and LDH (n=5960).

|               |        | 1. Definitely True | 2. Mostly True | 3. Don't know | 4. Mostly False | 5. Definitely False |
|---------------|--------|--------------------|----------------|---------------|-----------------|---------------------|
| LSS,<br>n (%) | Preop  | 78 (1.97)          | 226 (5.69)     | 1197 (30.2)   | 935 (23.6)      | 1533 (38.6)         |
|               | Year 1 | 157 (3.96)         | 489 (12.3)     | 1471 (37.1)   | 724 (18.2)      | 1128 (28.4)         |
| LDH,<br>n (%) | Preop  | 93 (1.56)          | 206 (3.46)     | 1034 (17.3)   | 1307 (21.9)     | 3320 (55.7)         |
|               | Year 1 | 137 (2.3)          | 427 (7.16)     | 1483 (24.9)   | 1270 (21.3)     | 2643 (44.3)         |

**Table S3** Preoperative and year one postoperative SF-36 data for patients treated surgically for one-level central spinal stenosis between 2007 to 2016.

|    | Negative future health expectations preoperatively |                           |                  | Positive future health expectations preoperatively |                           |                       |
|----|----------------------------------------------------|---------------------------|------------------|----------------------------------------------------|---------------------------|-----------------------|
|    | Preop Mean<br>(95% CI)                             | Year one Mean<br>(95% CI) | SRM<br>(95% CI)  | Preop Mean<br>(95% CI)                             | Year one Mean<br>(95% CI) | SRM<br>(95% CI)       |
| PF | 35 (34;36)                                         | 54 (53;55)                | 0.78 (0.72;0.83) | 41 (40;42)                                         | 67 (66;68)                | 1.06 (1.01;1.11)      |
| RP | 11 (9.7;12)                                        | 38 (36;40)                | 0.62 (0.57;0.67) | 17 (16;18)                                         | 57 (56;59)                | 0.87 (0.82;0.92)      |
| BP | 28 (27;28)                                         | 50 (49;51)                | 0.86 (0.82;0.91) | 30 (29;31)                                         | 60 (59;61)                | 1.08 (1.04;1.12)      |
| GH | 48 (47;48)                                         | 53 (51;54)                | 0.27 (0.22;0.32) | 69 (69;70)                                         | 69 (68;69)                | -0.024 (-0.063;0.015) |
| VT | 35 (34;36)                                         | 49 (47;50)                | 0.59 (0.54;0.64) | 44 (44;45)                                         | 61 (60;62)                | 0.68 (0.64;0.72)      |
| SF | 53 (52;54)                                         | 71 (69;72)                | 0.61 (0.56;0.67) | 63 (62;64)                                         | 82 (81;83)                | 0.66 (0.62;0.71)      |
| RE | 35 (33;37)                                         | 57 (55;59)                | 0.42 (0.37;0.47) | 52 (50;54)                                         | 75 (74;77)                | 0.46 (0.42;0.5)       |
| MH | 61 (60;62)                                         | 70 (69;71)                | 0.45 (0.4;0.5)   | 71 (70;72)                                         | 80 (79;81)                | 0.44 (0.4;0.48)       |

**Table S4** Preoperative and year one postoperative SF-36 data for patients treated surgically for one-level disk herniation between 2007 to 2016.

|    | Negative future health expectations preoperatively |                           |                  | Positive future health expectations preoperatively |                           |                    |
|----|----------------------------------------------------|---------------------------|------------------|----------------------------------------------------|---------------------------|--------------------|
|    | Preop Mean<br>(95% CI)                             | Year one Mean<br>(95% CI) | SRM<br>(95% CI)  | Preop Mean<br>(95% CI)                             | Year one Mean<br>(95% CI) | SRM<br>(95% CI)    |
| PF | 37 (36;38)                                         | 71 (69;72)                | 1.2 (1.1;1.3)    | 41 (41;42)                                         | 81 (81;82)                | 1.54 (1.49;1.58)   |
| RP | 8.9 (7.8;10)                                       | 53 (51;56)                | 0.99 (0.93;1.1)  | 10 (9.7;11)                                        | 69 (68;71)                | 1.37 (1.32;1.41)   |
| BP | 20 (19;21)                                         | 56 (55;58)                | 1.3 (1.2;1.3)    | 23 (22;23)                                         | 67 (66;67)                | 1.55 (1.51;1.59)   |
| GH | 49 (48;50)                                         | 57 (56;59)                | 0.39 (0.34;0.45) | 74 (74;75)                                         | 76 (75;76)                | 0.076 (0.048;0.11) |
| VT | 28 (27;29)                                         | 51 (49;52)                | 0.88 (0.81;0.94) | 35 (35;36)                                         | 64 (63;64)                | 1.1 (1.1;1.1)      |
| SF | 42 (41;44)                                         | 75 (74;77)                | 1 (0.97;1.1)     | 49 (48;50)                                         | 87 (86;87)                | 1.2 (1.1;1.2)      |
| RE | 34 (32;36)                                         | 68 (66;70)                | 0.67 (0.61;0.73) | 50 (49;52)                                         | 83 (82;84)                | 0.66 (0.62;0.69)   |
| MH | 52 (51;53)                                         | 69 (68;70)                | 0.74 (0.68;0.79) | 64 (63;65)                                         | 81 (80;81)                | 0.79 (0.75;0.82)   |

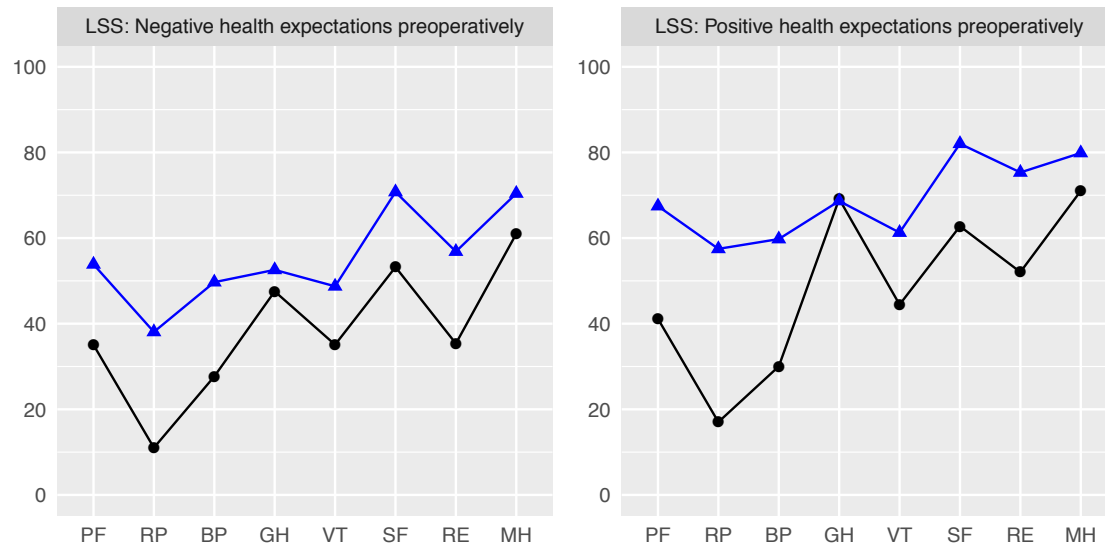

**Figure S1** SF-36 profiles preoperatively (black circles) and year one postoperatively (blue triangles) for patients with negative and positive future health expectations preoperatively treated for LSS. PF = physical functioning, RP = role limitation due to physical problems, BP = bodily pain, GH = general health, VT = vitality, SF = social functioning, RE = role limitations due to emotional problems, and MH = mental health.

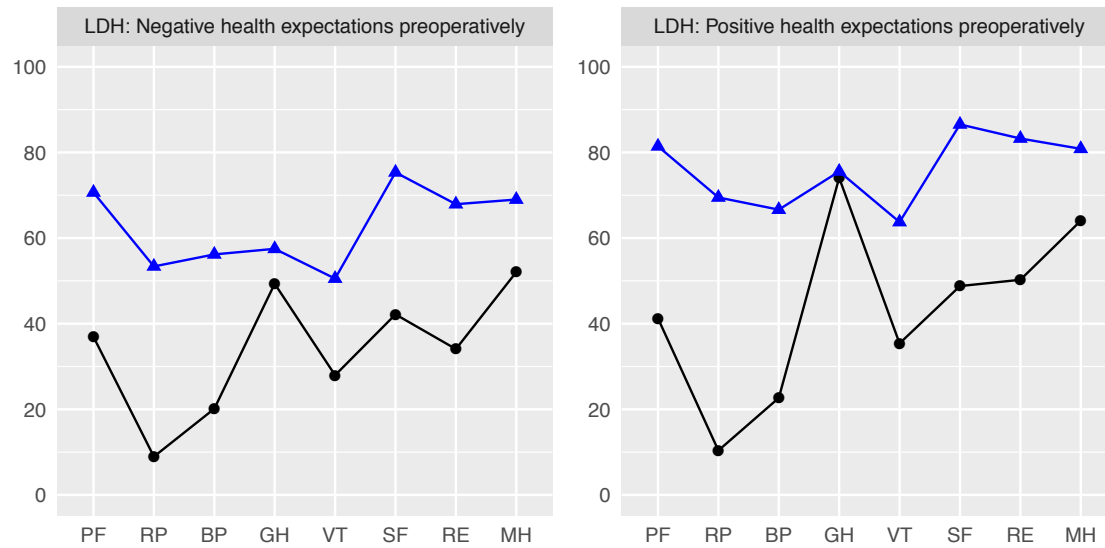

**Figure S2** SF-36 profiles preoperatively (black circles) and year one postoperatively (blue triangles) for patients with negative and positive future health expectations preoperatively treated for LDH. PF = physical functioning, RP = role limitation due to physical problems, BP = bodily pain, GH = general health, VT = vitality, SF = social functioning, RE = role limitations due to emotional problems, and MH = mental health.
